# Supplementary material for: Nutritional Assessment of Lactarius drassinus and L. controversus from the Cold Desert Region of the Northwest Himalayas for Their Potential as Food Supplements
Source: MDPI journal article supplement (doi:10.3390/jof9070763), 2023-07-20
Supplement: s1 [file s1]

## Supplementary Material S2

### **Nutritional Assessment of *Lactarius drassinus* and *L. controversus* from Cold Desert Region of Northwest Himalayas for Their Potential as Food Supplements**

Hom-Singli Mayirnao<sup>a</sup>, E-mail address: homsingli08@gmail.com

Samta Gupta<sup>a</sup> E-mail address: guptasamta0203@gmail.com

Sarda Devi Thokchom<sup>a</sup>, E-mail address: srd17thkchm@gmail.com

Karuna Sharma<sup>a</sup>, E-mail address: sharmak210596@gmail.com

Tahir Mehmood<sup>b</sup>, E-mail address: mehmoodt898@gmail.com

Surinder Kaur<sup>c</sup>, E-mail address: surinder@sgtbkhalsa.du.ac.in

Yash Pal Sharma<sup>b</sup>, E-mail address: yashdbm3@yahoo.co.in

Rupam Kapoor<sup>a\*</sup> E-mail address: kapoor\_rupam@yahoo.com

<sup>a</sup>Department of Botany, University of Delhi, Delhi-110007, India

<sup>b</sup>Department of Botany, University of Jammu, Jammu- 180016, India.

<sup>c</sup>SGTB Khalsa College, University of Delhi, Delhi-110007, India

\*Corresponding author

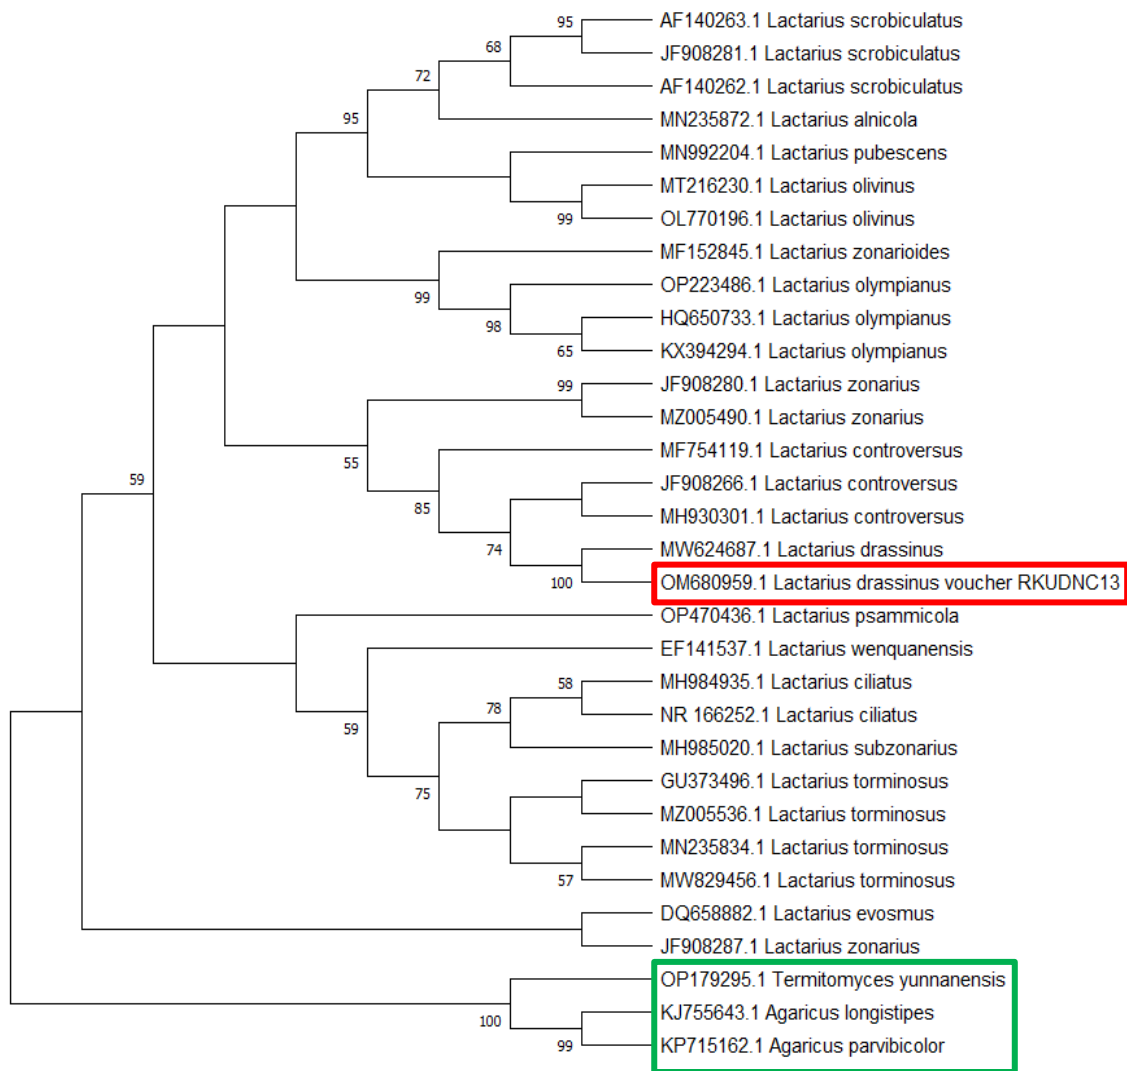

**Figure S1.** Neighbor-Joining tree constructed using sequences of internal transcribed spacer (ITS) region of the rRNA of *Lactarius* spp. The bootstrap consensus tree inferred from 1000 replicates is taken to represent the evolutionary history of the taxa analyzed. Branches corresponding to partitions reproduced in less than 50% bootstrap replicates are collapsed. The evolutionary distances were computed using the Kimura 2-parameter method and are in the units of the number of base substitutions per site. The rate variation among sites was modeled with a gamma distribution. *L. drassinus* is highlighted in red and the outgroup (*Termitomyces yunnanensis*, *Agaricus longistipes*, and *A. parvibicolor*) in green.

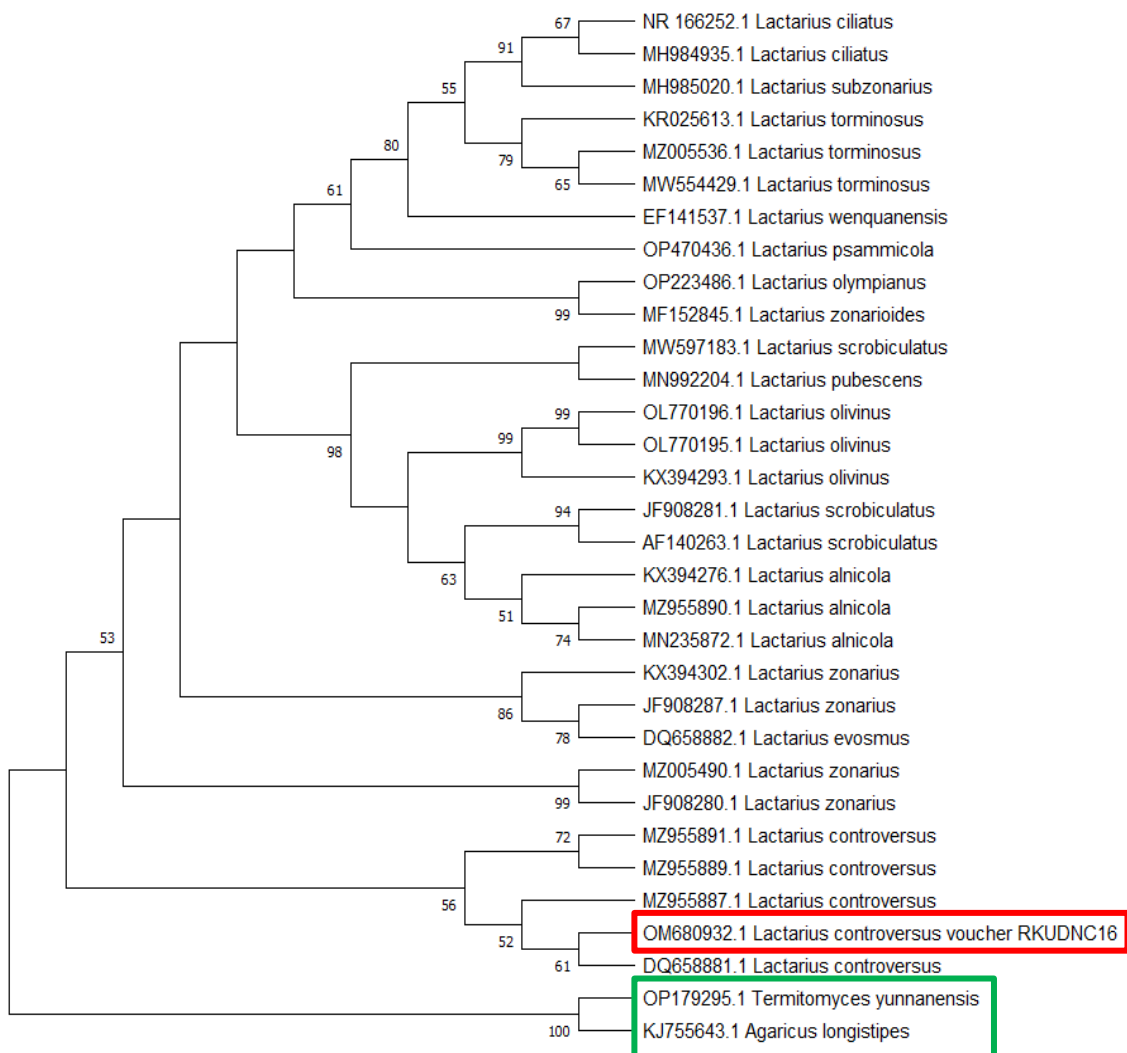

**Figure S2.** Neighbor-Joining tree constructed using sequences of internal transcribed spacer (ITS) region of the rRNA of *Lactarius* spp. The bootstrap consensus tree inferred from 1000 replicates is taken to represent the evolutionary history of the taxa analyzed. Branches corresponding to partitions reproduced in less than 50% bootstrap replicates are collapsed. The evolutionary distances were computed using the Kimura 2-parameter method and are in the units of the number of base substitutions per site. The rate variation among sites was modeled with a gamma distribution. *L. controversus* is highlighted in red and the outgroup (*Termitomyces yunnanensis* and *Agaricus longistipes*) in green.
